# Supplementary material for: A spatial genetics approach to inform vector control of tsetse flies (Glossina fuscipes fuscipes) in Northern Uganda
Source: PubMed Central journal article supplement (PMC6010828; doi:10.1002/ece3.4050), 2018-05-04
Supplement: ECE3-8-5336-s001.pdf [file ECE3-8-5336-s001.pdf]

**Appendix S1.** Additional tables providing details on the environmental data layers included (Fig. 2: I<sub>2</sub>), the field survey data included (Fig. 2: I<sub>3</sub>), the genetic samples of *Glossina fuscipes fuscipes* from northern Uganda used in the landscape genetics analysis (Fig. 2: I<sub>1</sub>), and data on the *ad hoc* sample from a model-predicted isolated patch. Table S1 provides details on the initial 13 environmental variables included, Table S2 provides the field-survey coordinates, Table S3 provides pairwise F<sub>ST</sub> values, Table S4 provides the genetic and geographic distances of the 38 landscape genetics sites used in the test for isolation by distance, and Table S5 provides pairwise F<sub>ST</sub> of the *ad hoc* model-predicted isolated patch with the 38 genetic samples included in the landscape genetics analysis.

**Table S1.** Initial thirteen environmental variables included; the broad type of variable, description, units, pixel size, time period of data collection used, and the source including the product name or number. Variables found to be independent from one another based on linear regression analysis and PCA are marked (\*). See Figures S1 and S2 for details.

| Type               | Description                                            | Unit                           | Original Pixel Size            | Period      | Source                                           |
|--------------------|--------------------------------------------------------|--------------------------------|--------------------------------|-------------|--------------------------------------------------|
| Water availability | Mean annual rainfall*                                  | mm                             | 8 km <sup>2</sup>              | 2008 - 2011 | FEWS <sup>1</sup><br>Dekadal (10-day)            |
| Water availability | Latent evaporation                                     | W / m <sup>2</sup>             | 1 km <sup>2</sup>              | 2008 - 2011 | NTSG <sup>2</sup><br>MOD16A2 (monthly)           |
| Temperature        | Mean annual daytime land surface temperatures*         | Kelvin                         | 1 km <sup>2</sup>              | 2008 - 2011 | USGS <sup>3</sup><br>MOD11A2 (8-day)             |
| Temperature        | Mean annual nighttime land surface temperatures*       | Kelvin                         | 1 km <sup>2</sup>              | 2008 - 2011 | USGS <sup>3</sup><br>MOD11A2 (8-day)             |
| Vegetative         | Normalized difference vegetation index (NDVI)*         | NDVI                           | 1 km <sup>2</sup>              | 2008 - 2011 | USGS <sup>3</sup><br>MOD13A2 (16-day)            |
| Vegetative         | Enhanced vegetation index                              | EVI                            | 1 km <sup>2</sup>              | 2008 - 2011 | USGS <sup>3</sup><br>MOD13A2 (16-day)            |
| Vegetative         | Leaf area index                                        | m <sup>2</sup> /m <sup>2</sup> | 0.5 km <sup>2</sup>            | 2008 - 2011 | USGS <sup>3</sup><br>MOD15A2H (8-day)            |
| Vegetative         | Mean annual tree cover                                 | Percent                        | 1 km <sup>2</sup>              | 2010        | GLCF <sup>4</sup><br>MOD44B                      |
| Photosynthesis     | Net photosynthesis*                                    | GPP – MR                       | 0.5 km <sup>2</sup>            | 2008 - 2011 | USGS <sup>3</sup><br>MOD17A2H (8-day)            |
| Photosynthesis     | Gross primary production                               | kg C m <sup>2</sup>            | 0.5 km <sup>2</sup>            | 2008 - 2011 | USGS <sup>3</sup><br>MOD17A2H (8-day)            |
| Photosynthesis     | Fraction of photosynthetically active radiation (fPAR) | Percent                        | 0.5 km <sup>2</sup>            | 2008 - 2011 | USGS <sup>3</sup><br>MOD15A2H (8-day)            |
| Photosynthesis     | Evapotranspiration                                     | mm / month                     | 1 km <sup>2</sup>              | 2008 - 2011 | NTSG <sup>2</sup><br>MOD16A2 (monthly)           |
| Elevation          | Elevation above sea level                              | meters (MASL)                  | 90 m <sup>2</sup> (equatorial) | N/A         | CGIAR-CSI <sup>5</sup><br>SRTM Digital Elevation |

<sup>1</sup> NOAA's Famine Early Warning System (<http://earlywarning.usgs.gov/fews>)

<sup>2</sup> Numerical Terradynamic Simulation Group (<http://www.ntsug.umd.edu/project/mod16>)

<sup>3</sup> United States Geologic Survey ([https://lpdaac.usgs.gov/dataset\\_discovery/modis/modis\\_products\\_table](https://lpdaac.usgs.gov/dataset_discovery/modis/modis_products_table))

<sup>4</sup> Global Land Cover Facility (<http://glcf.umd.edu/data/vcf>)

<sup>5</sup> Consultative Group on International Agricultural Research Consortium for Spatial Information ([srtm.csi.cgiar.org](http://srtm.csi.cgiar.org))

**Table S2.** Field-survey geographic coordinate number (#), latitude (Lat), and longitude (Long) of 317 *Glossina fuscipes fuscipes* presence-only data points used as MaxEnt (Elith et al., 2011) model input.

| #  | Lat   | Long   | #   | Lat   | Long   | #   | Lat   | Long   | #   | Lat   | Long   | #   | Lat   | Long   | #   | Lat   | Long   |
|----|-------|--------|-----|-------|--------|-----|-------|--------|-----|-------|--------|-----|-------|--------|-----|-------|--------|
| 1  | 3.694 | 31.779 | 56  | 3.378 | 31.995 | 111 | 3.260 | 32.225 | 166 | 2.607 | 32.939 | 221 | 2.427 | 32.628 | 276 | 2.270 | 32.520 |
| 2  | 3.694 | 31.779 | 57  | 3.378 | 31.995 | 112 | 3.260 | 32.225 | 167 | 2.607 | 32.938 | 222 | 2.427 | 32.628 | 277 | 2.270 | 32.520 |
| 3  | 3.693 | 31.781 | 58  | 3.378 | 31.993 | 113 | 3.260 | 32.224 | 168 | 2.607 | 32.938 | 223 | 2.427 | 32.628 | 278 | 2.270 | 32.520 |
| 4  | 3.693 | 31.781 | 59  | 3.378 | 31.993 | 114 | 3.260 | 32.224 | 169 | 2.607 | 32.937 | 224 | 2.426 | 32.629 | 279 | 2.270 | 32.520 |
| 5  | 3.693 | 31.780 | 60  | 3.378 | 31.993 | 115 | 3.259 | 32.224 | 170 | 2.607 | 32.937 | 225 | 2.426 | 32.628 | 280 | 2.269 | 32.521 |
| 6  | 3.693 | 31.780 | 61  | 3.377 | 31.994 | 116 | 3.253 | 31.125 | 171 | 2.607 | 32.937 | 226 | 2.426 | 32.628 | 281 | 2.269 | 32.522 |
| 7  | 3.693 | 31.779 | 62  | 3.377 | 31.994 | 117 | 3.253 | 31.125 | 172 | 2.517 | 31.597 | 227 | 2.415 | 32.599 | 282 | 2.189 | 32.412 |
| 8  | 3.692 | 31.780 | 63  | 3.377 | 31.994 | 118 | 3.253 | 31.124 | 173 | 2.517 | 31.597 | 228 | 2.414 | 32.600 | 283 | 2.080 | 32.677 |
| 9  | 3.692 | 31.780 | 64  | 3.306 | 31.745 | 119 | 3.253 | 31.121 | 174 | 2.517 | 31.597 | 229 | 2.414 | 32.600 | 284 | 2.080 | 32.676 |
| 10 | 3.692 | 31.780 | 65  | 3.306 | 31.745 | 120 | 3.253 | 31.120 | 175 | 2.515 | 31.588 | 230 | 2.413 | 32.599 | 285 | 2.080 | 32.676 |
| 11 | 3.691 | 31.780 | 66  | 3.306 | 31.745 | 121 | 3.253 | 31.120 | 176 | 2.494 | 32.712 | 231 | 2.373 | 32.675 | 286 | 2.080 | 32.676 |
| 12 | 3.691 | 31.780 | 67  | 3.306 | 31.117 | 122 | 3.253 | 31.119 | 177 | 2.493 | 32.714 | 232 | 2.373 | 32.675 | 287 | 2.080 | 32.676 |
| 13 | 3.691 | 31.780 | 68  | 3.306 | 31.117 | 123 | 3.252 | 31.126 | 178 | 2.493 | 32.713 | 233 | 2.373 | 32.675 | 288 | 2.079 | 32.676 |
| 14 | 3.669 | 32.592 | 69  | 3.305 | 31.119 | 124 | 3.252 | 31.124 | 179 | 2.493 | 32.712 | 234 | 2.373 | 32.674 | 289 | 2.079 | 32.676 |
| 15 | 3.669 | 32.591 | 70  | 3.305 | 31.118 | 125 | 3.252 | 31.121 | 180 | 2.492 | 32.713 | 235 | 2.373 | 32.673 | 290 | 2.079 | 32.676 |
| 16 | 3.669 | 32.591 | 71  | 3.305 | 31.117 | 126 | 3.252 | 31.121 | 181 | 2.492 | 32.694 | 236 | 2.373 | 32.673 | 291 | 2.079 | 32.676 |
| 17 | 3.669 | 32.591 | 72  | 3.304 | 31.120 | 127 | 3.252 | 31.121 | 182 | 2.492 | 32.694 | 237 | 2.372 | 32.677 | 292 | 2.078 | 32.676 |
| 18 | 3.647 | 31.790 | 73  | 3.304 | 31.120 | 128 | 3.251 | 31.122 | 183 | 2.492 | 32.694 | 238 | 2.372 | 32.677 | 293 | 1.925 | 33.157 |
| 19 | 3.646 | 31.789 | 74  | 3.304 | 31.120 | 129 | 3.242 | 32.761 | 184 | 2.485 | 32.012 | 239 | 2.372 | 32.676 | 294 | 1.925 | 33.157 |
| 20 | 3.640 | 31.788 | 75  | 3.304 | 31.119 | 130 | 3.242 | 32.761 | 185 | 2.467 | 32.568 | 240 | 2.372 | 32.676 | 295 | 1.925 | 33.156 |
| 21 | 3.638 | 31.718 | 76  | 3.304 | 31.119 | 131 | 3.242 | 32.761 | 186 | 2.467 | 32.565 | 241 | 2.372 | 32.676 | 296 | 1.925 | 33.156 |
| 22 | 3.612 | 32.682 | 77  | 3.294 | 32.782 | 132 | 3.214 | 31.726 | 187 | 2.448 | 32.661 | 242 | 2.371 | 32.677 | 297 | 1.925 | 33.156 |
| 23 | 3.612 | 32.682 | 78  | 3.293 | 32.783 | 133 | 3.214 | 31.726 | 188 | 2.448 | 32.661 | 243 | 2.371 | 32.677 | 298 | 1.909 | 33.160 |
| 24 | 3.612 | 32.681 | 79  | 3.293 | 32.783 | 134 | 3.214 | 31.726 | 189 | 2.448 | 32.661 | 244 | 2.365 | 32.715 | 299 | 1.908 | 33.160 |
| 25 | 3.611 | 32.681 | 80  | 3.293 | 32.782 | 135 | 3.214 | 31.726 | 190 | 2.448 | 32.661 | 245 | 2.364 | 32.715 | 300 | 1.908 | 33.160 |
| 26 | 3.607 | 31.660 | 81  | 3.293 | 32.782 | 136 | 3.214 | 31.726 | 191 | 2.448 | 32.661 | 246 | 2.364 | 32.715 | 301 | 1.908 | 33.160 |
| 27 | 3.607 | 31.659 | 82  | 3.292 | 31.122 | 137 | 3.213 | 31.726 | 192 | 2.448 | 32.661 | 247 | 2.361 | 32.715 | 302 | 1.847 | 33.153 |
| 28 | 3.593 | 31.607 | 83  | 3.292 | 31.120 | 138 | 3.213 | 31.726 | 193 | 2.448 | 32.660 | 248 | 2.361 | 32.715 | 303 | 1.847 | 33.153 |
| 29 | 3.593 | 31.607 | 84  | 3.291 | 31.119 | 139 | 3.213 | 31.726 | 194 | 2.448 | 32.660 | 249 | 2.361 | 32.715 | 304 | 1.847 | 33.153 |
| 30 | 3.592 | 31.606 | 85  | 3.291 | 31.119 | 140 | 3.213 | 31.726 | 195 | 2.448 | 32.660 | 250 | 2.361 | 32.715 | 305 | 1.847 | 33.152 |
| 31 | 3.487 | 32.009 | 86  | 3.281 | 32.855 | 141 | 3.213 | 31.726 | 196 | 2.447 | 32.661 | 251 | 2.361 | 32.715 | 306 | 1.847 | 33.152 |
| 32 | 3.487 | 32.009 | 87  | 3.281 | 32.854 | 142 | 3.213 | 31.726 | 197 | 2.447 | 32.661 | 252 | 2.361 | 32.715 | 307 | 1.847 | 33.152 |
| 33 | 3.487 | 32.009 | 88  | 3.281 | 32.854 | 143 | 3.213 | 31.726 | 198 | 2.446 | 32.659 | 253 | 2.356 | 32.716 | 308 | 1.847 | 33.152 |
| 34 | 3.486 | 32.011 | 89  | 3.281 | 32.854 | 144 | 3.213 | 31.726 | 199 | 2.446 | 32.659 | 254 | 2.356 | 32.716 | 309 | 1.846 | 33.151 |
| 35 | 3.486 | 32.011 | 90  | 3.272 | 31.133 | 145 | 3.213 | 31.726 | 200 | 2.446 | 32.659 | 255 | 2.355 | 32.716 | 310 | 1.846 | 33.151 |
| 36 | 3.485 | 32.012 | 91  | 3.272 | 31.133 | 146 | 3.188 | 31.719 | 201 | 2.428 | 32.629 | 256 | 2.355 | 32.715 | 311 | 1.804 | 33.104 |
| 37 | 3.485 | 32.012 | 92  | 3.272 | 31.133 | 147 | 3.188 | 31.719 | 202 | 2.428 | 32.629 | 257 | 2.355 | 32.715 | 312 | 1.803 | 33.104 |
| 38 | 3.485 | 32.012 | 93  | 3.272 | 31.130 | 148 | 3.164 | 32.522 | 203 | 2.428 | 32.628 | 258 | 2.271 | 32.520 | 313 | 1.803 | 33.104 |
| 39 | 3.485 | 32.011 | 94  | 3.267 | 32.208 | 149 | 3.163 | 32.523 | 204 | 2.428 | 32.628 | 259 | 2.271 | 32.520 | 314 | 1.803 | 33.103 |
| 40 | 3.484 | 32.012 | 95  | 3.267 | 31.135 | 150 | 3.163 | 32.523 | 205 | 2.428 | 32.628 | 260 | 2.271 | 32.520 | 315 | 1.802 | 33.103 |
| 41 | 3.483 | 32.012 | 96  | 3.267 | 31.135 | 151 | 3.150 | 31.680 | 206 | 2.427 | 32.630 | 261 | 2.271 | 32.520 | 316 | 1.802 | 33.103 |
| 42 | 3.483 | 32.012 | 97  | 3.266 | 32.208 | 152 | 3.031 | 32.767 | 207 | 2.427 | 32.630 | 262 | 2.270 | 32.522 | 317 | 1.674 | 33.537 |
| 43 | 3.483 | 32.012 | 98  | 3.266 | 32.208 | 153 | 3.030 | 32.768 | 208 | 2.427 | 32.630 | 263 | 2.270 | 32.522 |     |       |        |
| 44 | 3.483 | 32.012 | 99  | 3.266 | 32.208 | 154 | 3.030 | 32.768 | 209 | 2.427 | 32.630 | 264 | 2.270 | 32.522 |     |       |        |
| 45 | 3.483 | 32.012 | 100 | 3.266 | 32.208 | 155 | 3.019 | 32.756 | 210 | 2.427 | 32.629 | 265 | 2.270 | 32.522 |     |       |        |
| 46 | 3.483 | 32.012 | 101 | 3.266 | 31.135 | 156 | 3.019 | 32.755 | 211 | 2.427 | 32.629 | 266 | 2.270 | 32.521 |     |       |        |
| 47 | 3.479 | 31.594 | 102 | 3.265 | 32.209 | 157 | 2.959 | 32.582 | 212 | 2.427 | 32.629 | 267 | 2.270 | 32.521 |     |       |        |
| 48 | 3.479 | 31.593 | 103 | 3.265 | 32.209 | 158 | 2.958 | 32.581 | 213 | 2.427 | 32.629 | 268 | 2.270 | 32.521 |     |       |        |
| 49 | 3.478 | 31.593 | 104 | 3.263 | 31.130 | 159 | 2.957 | 32.582 | 214 | 2.427 | 32.628 | 269 | 2.270 | 32.521 |     |       |        |
| 50 | 3.441 | 32.854 | 105 | 3.263 | 31.130 | 160 | 2.840 | 32.965 | 215 | 2.427 | 32.628 | 270 | 2.270 | 32.521 |     |       |        |
| 51 | 3.441 | 32.853 | 106 | 3.262 | 31.134 | 161 | 2.840 | 32.964 | 216 | 2.427 | 32.628 | 271 | 2.270 | 32.521 |     |       |        |
| 52 | 3.441 | 32.853 | 107 | 3.262 | 31.134 | 162 | 2.756 | 32.953 | 217 | 2.427 | 32.628 | 272 | 2.270 | 32.521 |     |       |        |
| 53 | 3.378 | 31.995 | 108 | 3.261 | 32.224 | 163 | 2.756 | 32.953 | 218 | 2.427 | 32.628 | 273 | 2.270 | 32.521 |     |       |        |
| 54 | 3.378 | 31.995 | 109 | 3.261 | 32.224 | 164 | 2.738 | 32.950 | 219 | 2.427 | 32.628 | 274 | 2.270 | 32.521 |     |       |        |
| 55 | 3.378 | 31.995 | 110 | 3.261 | 32.224 | 165 | 2.737 | 32.950 | 220 | 2.427 | 32.628 | 275 | 2.270 | 32.521 |     |       |        |

**Table S3.** Pairwise  $F_{ST}$  from Opiro et al. (2017) below the diagonal as estimated in ARLEQUIN (Excoffier & Lischer, 2010) with Wright's statistics (Wright, 1951), and adjusted for finite populations (Rousset et al. 2007) using the equation  $F_{ST}/(1-F_{ST})$  above the diagonal.

|    | 1     | 2     | 3     | 4     | 5     | 6     | 7     | 8     | 9     | 10    | 11    | 12    | 13    |
|----|-------|-------|-------|-------|-------|-------|-------|-------|-------|-------|-------|-------|-------|
| 1  |       | 0.012 | 0.015 | 0.017 | 0.058 | 0.028 | 0.047 | 0.016 | 0.037 | 0.049 | 0.024 | 0.038 | 0.031 |
| 2  | 0.012 |       | 0.000 | 0.004 | 0.044 | 0.032 | 0.034 | 0.035 | 0.034 | 0.041 | 0.003 | 0.027 | 0.033 |
| 3  | 0.015 | 0.000 |       | 0.004 | 0.052 | 0.033 | 0.058 | 0.053 | 0.044 | 0.060 | 0.012 | 0.043 | 0.050 |
| 4  | 0.017 | 0.004 | 0.004 |       | 0.035 | 0.026 | 0.047 | 0.055 | 0.026 | 0.052 | 0.015 | 0.031 | 0.036 |
| 5  | 0.055 | 0.042 | 0.049 | 0.034 |       | 0.073 | 0.074 | 0.071 | 0.050 | 0.063 | 0.043 | 0.029 | 0.042 |
| 6  | 0.027 | 0.031 | 0.032 | 0.025 | 0.068 |       | 0.021 | 0.037 | 0.009 | 0.055 | 0.032 | 0.042 | 0.019 |
| 7  | 0.045 | 0.033 | 0.055 | 0.045 | 0.069 | 0.021 |       | 0.030 | 0.019 | 0.073 | 0.025 | 0.043 | 0.027 |
| 8  | 0.016 | 0.034 | 0.050 | 0.052 | 0.066 | 0.036 | 0.029 |       | 0.032 | 0.056 | 0.056 | 0.058 | 0.033 |
| 9  | 0.036 | 0.033 | 0.042 | 0.025 | 0.048 | 0.009 | 0.019 | 0.031 |       | 0.047 | 0.032 | 0.032 | 0.033 |
| 10 | 0.047 | 0.039 | 0.057 | 0.049 | 0.059 | 0.052 | 0.068 | 0.053 | 0.045 |       | 0.033 | 0.019 | 0.036 |
| 11 | 0.023 | 0.003 | 0.012 | 0.015 | 0.041 | 0.031 | 0.024 | 0.053 | 0.031 | 0.032 |       | 0.011 | 0.014 |
| 12 | 0.037 | 0.026 | 0.041 | 0.030 | 0.028 | 0.040 | 0.041 | 0.055 | 0.031 | 0.019 | 0.011 |       | 0.009 |
| 13 | 0.030 | 0.032 | 0.048 | 0.035 | 0.040 | 0.019 | 0.026 | 0.032 | 0.032 | 0.035 | 0.014 | 0.009 |       |
| 14 | 0.030 | 0.028 | 0.044 | 0.036 | 0.045 | 0.022 | 0.034 | 0.033 | 0.023 | 0.015 | 0.013 | 0.014 | 0.005 |
| 15 | 0.035 | 0.026 | 0.047 | 0.031 | 0.051 | 0.036 | 0.035 | 0.040 | 0.046 | 0.056 | 0.014 | 0.035 | 0.017 |
| 16 | 0.056 | 0.055 | 0.076 | 0.051 | 0.076 | 0.069 | 0.069 | 0.065 | 0.069 | 0.073 | 0.046 | 0.067 | 0.043 |
| 17 | 0.092 | 0.084 | 0.119 | 0.100 | 0.124 | 0.070 | 0.077 | 0.085 | 0.081 | 0.086 | 0.078 | 0.086 | 0.061 |
| 18 | 0.036 | 0.037 | 0.055 | 0.044 | 0.055 | 0.016 | 0.050 | 0.046 | 0.033 | 0.046 | 0.018 | 0.031 | 0.013 |
| 19 | 0.047 | 0.052 | 0.068 | 0.067 | 0.057 | 0.042 | 0.054 | 0.042 | 0.048 | 0.065 | 0.033 | 0.045 | 0.018 |
| 20 | 0.040 | 0.037 | 0.060 | 0.047 | 0.063 | 0.036 | 0.049 | 0.047 | 0.042 | 0.049 | 0.022 | 0.037 | 0.016 |
| 21 | 0.039 | 0.029 | 0.057 | 0.052 | 0.067 | 0.051 | 0.060 | 0.045 | 0.062 | 0.062 | 0.045 | 0.054 | 0.035 |
| 22 | 0.035 | 0.043 | 0.060 | 0.052 | 0.054 | 0.031 | 0.060 | 0.041 | 0.042 | 0.053 | 0.032 | 0.027 | 0.012 |
| 23 | 0.042 | 0.043 | 0.062 | 0.044 | 0.052 | 0.039 | 0.070 | 0.062 | 0.049 | 0.050 | 0.025 | 0.034 | 0.028 |
| 24 | 0.036 | 0.045 | 0.058 | 0.045 | 0.048 | 0.036 | 0.061 | 0.040 | 0.032 | 0.043 | 0.045 | 0.032 | 0.023 |
| 25 | 0.052 | 0.062 | 0.073 | 0.067 | 0.057 | 0.045 | 0.082 | 0.054 | 0.054 | 0.058 | 0.046 | 0.055 | 0.026 |
| 26 | 0.044 | 0.042 | 0.055 | 0.053 | 0.050 | 0.052 | 0.078 | 0.042 | 0.042 | 0.061 | 0.042 | 0.056 | 0.035 |
| 27 | 0.053 | 0.058 | 0.079 | 0.066 | 0.058 | 0.058 | 0.079 | 0.052 | 0.049 | 0.045 | 0.063 | 0.051 | 0.031 |
| 28 | 0.047 | 0.045 | 0.057 | 0.051 | 0.042 | 0.055 | 0.080 | 0.061 | 0.044 | 0.053 | 0.029 | 0.025 | 0.026 |
| 29 | 0.054 | 0.062 | 0.079 | 0.068 | 0.052 | 0.054 | 0.078 | 0.057 | 0.054 | 0.065 | 0.060 | 0.044 | 0.025 |
| 30 | 0.050 | 0.073 | 0.080 | 0.078 | 0.069 | 0.068 | 0.098 | 0.068 | 0.075 | 0.078 | 0.047 | 0.060 | 0.042 |
| 31 | 0.059 | 0.067 | 0.085 | 0.076 | 0.064 | 0.057 | 0.086 | 0.064 | 0.067 | 0.075 | 0.055 | 0.062 | 0.032 |
| 32 | 0.059 | 0.058 | 0.082 | 0.070 | 0.053 | 0.075 | 0.109 | 0.066 | 0.080 | 0.059 | 0.068 | 0.050 | 0.031 |
| 33 | 0.064 | 0.089 | 0.098 | 0.079 | 0.078 | 0.069 | 0.117 | 0.081 | 0.076 | 0.095 | 0.081 | 0.075 | 0.050 |
| 34 | 0.083 | 0.100 | 0.107 | 0.082 | 0.072 | 0.087 | 0.126 | 0.101 | 0.088 | 0.121 | 0.095 | 0.089 | 0.067 |
| 35 | 0.076 | 0.100 | 0.108 | 0.094 | 0.089 | 0.081 | 0.114 | 0.090 | 0.083 | 0.108 | 0.090 | 0.085 | 0.067 |
| 36 | 0.057 | 0.080 | 0.080 | 0.065 | 0.075 | 0.058 | 0.109 | 0.075 | 0.065 | 0.087 | 0.073 | 0.065 | 0.051 |
| 37 | 0.074 | 0.097 | 0.096 | 0.077 | 0.081 | 0.080 | 0.130 | 0.095 | 0.073 | 0.102 | 0.094 | 0.077 | 0.069 |
| 38 | 0.072 | 0.090 | 0.105 | 0.087 | 0.086 | 0.084 | 0.121 | 0.092 | 0.080 | 0.110 | 0.078 | 0.081 | 0.066 |
|    | 14    | 15    | 16    | 17    | 18    | 19    | 20    | 21    | 22    | 23    | 24    | 25    | 26    |
| 1  | 0.031 | 0.036 | 0.059 | 0.101 | 0.037 | 0.049 | 0.042 | 0.041 | 0.036 | 0.044 | 0.037 | 0.055 | 0.046 |
| 2  | 0.029 | 0.027 | 0.058 | 0.092 | 0.038 | 0.055 | 0.038 | 0.030 | 0.045 | 0.045 | 0.047 | 0.066 | 0.044 |
| 3  | 0.046 | 0.049 | 0.082 | 0.135 | 0.058 | 0.073 | 0.064 | 0.060 | 0.064 | 0.066 | 0.062 | 0.079 | 0.058 |
| 4  | 0.037 | 0.032 | 0.054 | 0.111 | 0.046 | 0.072 | 0.049 | 0.055 | 0.055 | 0.046 | 0.047 | 0.072 | 0.056 |
| 5  | 0.047 | 0.054 | 0.082 | 0.142 | 0.058 | 0.060 | 0.067 | 0.072 | 0.057 | 0.055 | 0.050 | 0.060 | 0.053 |
| 6  | 0.022 | 0.037 | 0.074 | 0.075 | 0.016 | 0.044 | 0.037 | 0.054 | 0.032 | 0.041 | 0.037 | 0.047 | 0.055 |
| 7  | 0.035 | 0.036 | 0.074 | 0.083 | 0.053 | 0.057 | 0.052 | 0.064 | 0.064 | 0.075 | 0.065 | 0.089 | 0.085 |

|    |           |           |           |           |           |           |           |           |           |           |           |           |       |
|----|-----------|-----------|-----------|-----------|-----------|-----------|-----------|-----------|-----------|-----------|-----------|-----------|-------|
| 8  | 0.034     | 0.042     | 0.070     | 0.093     | 0.048     | 0.044     | 0.049     | 0.047     | 0.043     | 0.066     | 0.042     | 0.057     | 0.044 |
| 9  | 0.024     | 0.048     | 0.074     | 0.088     | 0.034     | 0.050     | 0.044     | 0.066     | 0.044     | 0.052     | 0.033     | 0.057     | 0.044 |
| 10 | 0.015     | 0.059     | 0.079     | 0.094     | 0.048     | 0.070     | 0.052     | 0.066     | 0.056     | 0.053     | 0.045     | 0.062     | 0.065 |
| 11 | 0.013     | 0.014     | 0.048     | 0.085     | 0.018     | 0.034     | 0.022     | 0.047     | 0.033     | 0.026     | 0.047     | 0.048     | 0.044 |
| 12 | 0.014     | 0.036     | 0.072     | 0.094     | 0.032     | 0.047     | 0.038     | 0.057     | 0.028     | 0.035     | 0.033     | 0.058     | 0.059 |
| 13 | 0.005     | 0.017     | 0.045     | 0.065     | 0.013     | 0.018     | 0.016     | 0.036     | 0.012     | 0.029     | 0.024     | 0.027     | 0.036 |
| 14 |           | 0.044     | 0.072     | 0.063     | 0.021     | 0.017     | 0.029     | 0.047     | 0.012     | 0.033     | 0.028     | 0.029     | 0.036 |
| 15 | 0.042     |           | 0.014     | 0.067     | 0.019     | 0.042     | 0.021     | 0.036     | 0.037     | 0.035     | 0.048     | 0.053     | 0.048 |
| 16 | 0.067     | 0.014     |           | 0.053     | 0.050     | 0.072     | 0.046     | 0.075     | 0.074     | 0.046     | 0.064     | 0.068     | 0.055 |
| 17 | 0.059     | 0.063     | 0.050     |           | 0.054     | 0.083     | 0.054     | 0.083     | 0.070     | 0.079     | 0.095     | 0.101     | 0.093 |
| 18 | 0.021     | 0.019     | 0.048     | 0.051     |           | 0.010     | 0.003     | 0.033     | 0.003     | 0.012     | 0.020     | 0.014     | 0.022 |
| 19 | 0.017     | 0.040     | 0.067     | 0.077     | 0.010     |           | 0.014     | 0.040     | 0.000     | 0.028     | 0.019     | 0.009     | 0.017 |
| 20 | 0.028     | 0.021     | 0.044     | 0.051     | 0.003     | 0.014     |           | 0.036     | 0.009     | 0.022     | 0.031     | 0.027     | 0.027 |
| 21 | 0.045     | 0.035     | 0.070     | 0.077     | 0.032     | 0.038     | 0.035     |           | 0.052     | 0.058     | 0.054     | 0.065     | 0.066 |
| 22 | 0.012     | 0.036     | 0.069     | 0.065     | 0.003     | 0.000     | 0.009     | 0.049     |           | 0.016     | 0.014     | 0.014     | 0.013 |
| 23 | 0.032     | 0.034     | 0.044     | 0.073     | 0.012     | 0.027     | 0.022     | 0.055     | 0.016     |           | 0.024     | 0.016     | 0.029 |
| 24 | 0.027     | 0.046     | 0.060     | 0.087     | 0.020     | 0.019     | 0.030     | 0.051     | 0.014     | 0.023     |           | 0.005     | 0.008 |
| 25 | 0.028     | 0.050     | 0.064     | 0.092     | 0.014     | 0.009     | 0.026     | 0.061     | 0.014     | 0.016     | 0.005     |           | 0.004 |
| 26 | 0.035     | 0.046     | 0.052     | 0.085     | 0.022     | 0.017     | 0.026     | 0.062     | 0.013     | 0.028     | 0.008     | 0.004     |       |
| 27 | 0.025     | 0.063     | 0.063     | 0.084     | 0.036     | 0.026     | 0.031     | 0.072     | 0.024     | 0.033     | 0.013     | 0.005     | 0.010 |
| 28 | 0.031     | 0.048     | 0.071     | 0.102     | 0.024     | 0.033     | 0.034     | 0.072     | 0.026     | 0.018     | 0.010     | 0.017     | 0.020 |
| 29 | 0.030     | 0.059     | 0.076     | 0.103     | 0.027     | 0.025     | 0.041     | 0.066     | 0.020     | 0.035     | 0.009     | 0.010     | 0.015 |
| 30 | 0.048     | 0.069     | 0.090     | 0.123     | 0.043     | 0.036     | 0.047     | 0.087     | 0.035     | 0.032     | 0.041     | 0.027     | 0.028 |
| 31 | 0.038     | 0.054     | 0.080     | 0.101     | 0.021     | 0.021     | 0.028     | 0.077     | 0.015     | 0.030     | 0.016     | 0.000     | 0.011 |
| 32 | 0.034     | 0.065     | 0.073     | 0.111     | 0.042     | 0.033     | 0.050     | 0.083     | 0.027     | 0.029     | 0.016     | 0.015     | 0.008 |
| 33 | 0.050     | 0.076     | 0.103     | 0.137     | 0.034     | 0.030     | 0.057     | 0.095     | 0.035     | 0.035     | 0.023     | 0.015     | 0.038 |
| 34 | 0.076     | 0.090     | 0.119     | 0.158     | 0.056     | 0.051     | 0.075     | 0.118     | 0.055     | 0.057     | 0.043     | 0.044     | 0.057 |
| 35 | 0.058     | 0.091     | 0.116     | 0.133     | 0.045     | 0.035     | 0.062     | 0.119     | 0.042     | 0.048     | 0.042     | 0.028     | 0.049 |
| 36 | 0.052     | 0.072     | 0.086     | 0.133     | 0.040     | 0.031     | 0.053     | 0.102     | 0.037     | 0.035     | 0.014     | 0.020     | 0.038 |
| 37 | 0.060     | 0.100     | 0.121     | 0.153     | 0.055     | 0.047     | 0.076     | 0.113     | 0.044     | 0.056     | 0.035     | 0.042     | 0.060 |
| 38 | 0.059     | 0.090     | 0.117     | 0.135     | 0.043     | 0.043     | 0.066     | 0.118     | 0.035     | 0.049     | 0.041     | 0.038     | 0.046 |
|    | <b>27</b> | <b>28</b> | <b>29</b> | <b>30</b> | <b>31</b> | <b>32</b> | <b>33</b> | <b>34</b> | <b>35</b> | <b>36</b> | <b>37</b> | <b>38</b> |       |
| 1  | 0.056     | 0.049     | 0.057     | 0.053     | 0.063     | 0.063     | 0.068     | 0.091     | 0.082     | 0.060     | 0.080     | 0.078     |       |
| 2  | 0.062     | 0.047     | 0.066     | 0.079     | 0.072     | 0.062     | 0.098     | 0.111     | 0.111     | 0.087     | 0.107     | 0.099     |       |
| 3  | 0.086     | 0.060     | 0.086     | 0.087     | 0.093     | 0.089     | 0.109     | 0.120     | 0.121     | 0.087     | 0.106     | 0.117     |       |
| 4  | 0.071     | 0.054     | 0.073     | 0.085     | 0.082     | 0.075     | 0.086     | 0.089     | 0.104     | 0.070     | 0.083     | 0.095     |       |
| 5  | 0.062     | 0.044     | 0.055     | 0.074     | 0.068     | 0.056     | 0.085     | 0.078     | 0.098     | 0.081     | 0.088     | 0.094     |       |
| 6  | 0.062     | 0.058     | 0.057     | 0.073     | 0.060     | 0.081     | 0.074     | 0.095     | 0.088     | 0.062     | 0.087     | 0.092     |       |
| 7  | 0.086     | 0.087     | 0.085     | 0.109     | 0.094     | 0.122     | 0.133     | 0.144     | 0.129     | 0.122     | 0.149     | 0.138     |       |
| 8  | 0.055     | 0.065     | 0.060     | 0.073     | 0.068     | 0.071     | 0.088     | 0.112     | 0.099     | 0.081     | 0.105     | 0.101     |       |
| 9  | 0.052     | 0.046     | 0.057     | 0.081     | 0.072     | 0.087     | 0.082     | 0.096     | 0.091     | 0.070     | 0.079     | 0.087     |       |
| 10 | 0.047     | 0.056     | 0.070     | 0.085     | 0.081     | 0.063     | 0.105     | 0.138     | 0.121     | 0.095     | 0.114     | 0.124     |       |
| 11 | 0.067     | 0.030     | 0.064     | 0.049     | 0.058     | 0.073     | 0.088     | 0.105     | 0.099     | 0.079     | 0.104     | 0.085     |       |
| 12 | 0.054     | 0.026     | 0.046     | 0.064     | 0.066     | 0.053     | 0.081     | 0.098     | 0.093     | 0.070     | 0.083     | 0.088     |       |
| 13 | 0.032     | 0.027     | 0.026     | 0.044     | 0.033     | 0.032     | 0.053     | 0.072     | 0.072     | 0.054     | 0.074     | 0.071     |       |
| 14 | 0.026     | 0.032     | 0.031     | 0.050     | 0.040     | 0.035     | 0.053     | 0.082     | 0.062     | 0.055     | 0.064     | 0.063     |       |
| 15 | 0.067     | 0.050     | 0.063     | 0.074     | 0.057     | 0.070     | 0.082     | 0.099     | 0.100     | 0.078     | 0.111     | 0.099     |       |
| 16 | 0.067     | 0.076     | 0.082     | 0.099     | 0.087     | 0.079     | 0.115     | 0.135     | 0.131     | 0.094     | 0.138     | 0.133     |       |
| 17 | 0.092     | 0.114     | 0.115     | 0.140     | 0.112     | 0.125     | 0.159     | 0.188     | 0.153     | 0.153     | 0.181     | 0.156     |       |
| 18 | 0.037     | 0.025     | 0.028     | 0.045     | 0.021     | 0.044     | 0.035     | 0.059     | 0.047     | 0.042     | 0.058     | 0.045     |       |

|    |       |       |       |       |       |       |       |       |       |       |       |       |
|----|-------|-------|-------|-------|-------|-------|-------|-------|-------|-------|-------|-------|
| 19 | 0.027 | 0.034 | 0.026 | 0.037 | 0.021 | 0.034 | 0.031 | 0.054 | 0.036 | 0.032 | 0.049 | 0.045 |
| 20 | 0.032 | 0.035 | 0.043 | 0.049 | 0.029 | 0.053 | 0.060 | 0.081 | 0.066 | 0.056 | 0.082 | 0.071 |
| 21 | 0.078 | 0.078 | 0.071 | 0.095 | 0.083 | 0.091 | 0.105 | 0.134 | 0.135 | 0.114 | 0.127 | 0.134 |
| 22 | 0.025 | 0.027 | 0.020 | 0.036 | 0.015 | 0.028 | 0.036 | 0.058 | 0.044 | 0.038 | 0.046 | 0.036 |
| 23 | 0.034 | 0.018 | 0.036 | 0.033 | 0.031 | 0.030 | 0.036 | 0.060 | 0.050 | 0.036 | 0.059 | 0.052 |
| 24 | 0.013 | 0.010 | 0.009 | 0.043 | 0.016 | 0.016 | 0.024 | 0.045 | 0.044 | 0.014 | 0.036 | 0.043 |
| 25 | 0.005 | 0.017 | 0.010 | 0.028 | 0.000 | 0.015 | 0.015 | 0.046 | 0.029 | 0.020 | 0.044 | 0.040 |
| 26 | 0.010 | 0.020 | 0.015 | 0.029 | 0.011 | 0.008 | 0.040 | 0.060 | 0.052 | 0.040 | 0.064 | 0.048 |
| 27 |       | 0.021 | 0.009 | 0.038 | 0.011 | 0.004 | 0.040 | 0.064 | 0.047 | 0.032 | 0.056 | 0.055 |
| 28 | 0.021 |       | 0.014 | 0.014 | 0.012 | 0.018 | 0.052 | 0.066 | 0.066 | 0.048 | 0.065 | 0.064 |
| 29 | 0.009 | 0.014 |       | 0.034 | 0.009 | 0.001 | 0.028 | 0.048 | 0.053 | 0.030 | 0.049 | 0.046 |
| 30 | 0.037 | 0.014 | 0.033 |       | 0.028 | 0.025 | 0.062 | 0.086 | 0.078 | 0.067 | 0.093 | 0.079 |
| 31 | 0.011 | 0.012 | 0.009 | 0.027 |       | 0.007 | 0.024 | 0.044 | 0.034 | 0.029 | 0.056 | 0.037 |
| 32 | 0.004 | 0.018 | 0.001 | 0.024 | 0.007 |       | 0.054 | 0.067 | 0.071 | 0.045 | 0.066 | 0.064 |
| 33 | 0.038 | 0.049 | 0.027 | 0.058 | 0.023 | 0.051 |       | 0.000 | 0.000 | 0.000 | 0.005 | 0.006 |
| 34 | 0.060 | 0.062 | 0.046 | 0.079 | 0.042 | 0.063 | 0.000 |       | 0.015 | 0.001 | 0.014 | 0.016 |
| 35 | 0.045 | 0.062 | 0.050 | 0.072 | 0.033 | 0.066 | 0.000 | 0.015 |       | 0.009 | 0.012 | 0.001 |
| 36 | 0.031 | 0.046 | 0.029 | 0.063 | 0.028 | 0.043 | 0.000 | 0.001 | 0.009 |       | 0.001 | 0.010 |
| 37 | 0.053 | 0.061 | 0.047 | 0.085 | 0.053 | 0.062 | 0.005 | 0.014 | 0.012 | 0.001 |       | 0.008 |
| 38 | 0.052 | 0.060 | 0.044 | 0.073 | 0.036 | 0.060 | 0.006 | 0.016 | 0.001 | 0.010 | 0.008 |       |

**Table S4.** Genetic and geographic distances used in the test for isolation by distance (IBD) with a Mantel test with 10,000 randomizations (Mantel et al., 1997; Goudet et al., 1996) implemented in the adegenet R library (Jombart et al., 2008, 2011). Genetic distances are below the diagonal and were generated using Reynold’s (1983) method, and geographic distances are above the diagonal and were generated using the Java based “geographic matrix generator” v1.2.3 (Erst, downloaded November 2017).

|    | 1    | 2    | 3    | 4    | 5    | 6    | 7    | 8    | 9    | 10   | 11   | 12   | 13   | 14   | 15   | 16   | 17   | 18   | 19   |
|----|------|------|------|------|------|------|------|------|------|------|------|------|------|------|------|------|------|------|------|
| 1  |      | 4.5  | 2.1  | 0.9  | 65.9 | 56.2 | 63.7 | 85.9 | 80.4 | 98.5 | 100  | 96.2 | 121  | 119  | 168  | 176  | 192  | 183  | 181  |
| 2  | 0.19 |      | 5.8  | 4.9  | 68.2 | 56.2 | 62.9 | 85.2 | 79.6 | 99.7 | 101  | 97.6 | 123  | 121  | 169  | 177  | 193  | 185  | 183  |
| 3  | 0.19 | 0.16 |      | 2.8  | 67.1 | 58.1 | 65.7 | 87.9 | 82.5 | 100  | 102  | 97.8 | 122  | 121  | 170  | 178  | 193  | 185  | 182  |
| 4  | 0.21 | 0.19 | 0.18 |      | 65.0 | 55.3 | 62.9 | 85.1 | 79.7 | 97.6 | 99.4 | 95.4 | 120  | 118  | 167  | 175  | 191  | 182  | 180  |
| 5  | 0.28 | 0.26 | 0.27 | 0.25 |      | 33.2 | 44.5 | 53.9 | 52.5 | 38.2 | 44.1 | 35.2 | 55.7 | 54.0 | 109  | 115  | 128  | 118  | 115  |
| 6  | 0.25 | 0.26 | 0.26 | 0.26 | 0.32 |      | 12.7 | 31.5 | 27.1 | 47.2 | 46.3 | 45.9 | 74.2 | 72.3 | 113  | 122  | 140  | 134  | 132  |
| 7  | 0.30 | 0.28 | 0.31 | 0.31 | 0.33 | 0.28 |      | 22.2 | 16.8 | 49.7 | 46.4 | 49.2 | 78.0 | 76.1 | 110  | 120  | 140  | 135  | 134  |
| 8  | 0.20 | 0.24 | 0.27 | 0.28 | 0.30 | 0.27 | 0.27 |      | 6.0  | 41.3 | 34.4 | 42.3 | 68.9 | 67.2 | 90.2 | 101  | 123  | 120  | 120  |
| 9  | 0.25 | 0.25 | 0.26 | 0.24 | 0.28 | 0.23 | 0.26 | 0.24 |      | 44.5 | 38.4 | 45.1 | 72.6 | 70.8 | 96.0 | 106  | 128  | 125  | 125  |
| 10 | 0.26 | 0.25 | 0.28 | 0.27 | 0.29 | 0.29 | 0.33 | 0.27 | 0.27 |      | 9.4  | 3.3  | 28.5 | 26.6 | 71.0 | 78.1 | 93.7 | 86.6 | 85.2 |
| 11 | 0.25 | 0.21 | 0.23 | 0.24 | 0.28 | 0.29 | 0.29 | 0.30 | 0.27 | 0.26 |      | 12.2 | 34.6 | 32.9 | 67.7 | 75.9 | 93.7 | 88.4 | 87.7 |
| 12 | 0.24 | 0.23 | 0.25 | 0.24 | 0.23 | 0.28 | 0.29 | 0.28 | 0.24 | 0.20 | 0.23 |      | 28.7 | 26.9 | 73.9 | 80.8 | 95.7 | 88.1 | 86.5 |
| 13 | 0.22 | 0.23 | 0.26 | 0.25 | 0.25 | 0.23 | 0.26 | 0.23 | 0.24 | 0.23 | 0.22 | 0.18 |      | 1.9  | 61.1 | 64.2 | 72.7 | 62.1 | 59.7 |
| 14 | 0.22 | 0.22 | 0.26 | 0.25 | 0.26 | 0.24 | 0.27 | 0.24 | 0.22 | 0.19 | 0.22 | 0.19 | 0.16 |      | 61.8 | 65.2 | 74.3 | 63.9 | 61.5 |
| 15 | 0.23 | 0.22 | 0.26 | 0.24 | 0.27 | 0.26 | 0.28 | 0.25 | 0.27 | 0.28 | 0.23 | 0.24 | 0.19 | 0.25 |      | 11.9 | 38.6 | 46.9 | 51.1 |
| 16 | 0.29 | 0.29 | 0.32 | 0.29 | 0.32 | 0.33 | 0.34 | 0.31 | 0.32 | 0.32 | 0.30 | 0.31 | 0.26 | 0.31 | 0.21 |      | 26.9 | 37.2 | 42.1 |
| 17 | 0.34 | 0.33 | 0.38 | 0.36 | 0.38 | 0.32 | 0.34 | 0.33 | 0.33 | 0.33 | 0.34 | 0.33 | 0.29 | 0.29 | 0.30 | 0.29 |      | 18.2 | 24.4 |
| 18 | 0.24 | 0.24 | 0.28 | 0.26 | 0.28 | 0.22 | 0.30 | 0.26 | 0.24 | 0.26 | 0.23 | 0.23 | 0.18 | 0.20 | 0.20 | 0.28 | 0.27 |      | 6.2  |
| 19 | 0.27 | 0.28 | 0.30 | 0.31 | 0.29 | 0.28 | 0.31 | 0.26 | 0.28 | 0.30 | 0.27 | 0.26 | 0.20 | 0.20 | 0.25 | 0.31 | 0.32 | 0.18 |      |
| 20 | 0.25 | 0.25 | 0.29 | 0.27 | 0.29 | 0.27 | 0.30 | 0.27 | 0.26 | 0.27 | 0.25 | 0.25 | 0.20 | 0.23 | 0.21 | 0.27 | 0.28 | 0.16 | 0.20 |
| 21 | 0.29 | 0.28 | 0.32 | 0.32 | 0.33 | 0.33 | 0.35 | 0.30 | 0.33 | 0.33 | 0.32 | 0.32 | 0.28 | 0.31 | 0.28 | 0.34 | 0.35 | 0.28 | 0.30 |
| 22 | 0.25 | 0.27 | 0.30 | 0.29 | 0.29 | 0.27 | 0.32 | 0.27 | 0.27 | 0.29 | 0.27 | 0.24 | 0.20 | 0.20 | 0.26 | 0.32 | 0.31 | 0.18 | 0.17 |
| 23 | 0.27 | 0.27 | 0.30 | 0.28 | 0.29 | 0.29 | 0.34 | 0.30 | 0.29 | 0.28 | 0.27 | 0.25 | 0.23 | 0.25 | 0.25 | 0.28 | 0.32 | 0.20 | 0.24 |
| 24 | 0.24 | 0.26 | 0.28 | 0.27 | 0.27 | 0.27 | 0.32 | 0.25 | 0.24 | 0.26 | 0.29 | 0.24 | 0.21 | 0.22 | 0.26 | 0.30 | 0.33 | 0.20 | 0.21 |
| 25 | 0.27 | 0.29 | 0.31 | 0.30 | 0.28 | 0.28 | 0.35 | 0.27 | 0.28 | 0.28 | 0.28 | 0.27 | 0.21 | 0.22 | 0.26 | 0.30 | 0.34 | 0.18 | 0.18 |
| 26 | 0.26 | 0.26 | 0.28 | 0.28 | 0.27 | 0.29 | 0.34 | 0.26 | 0.26 | 0.29 | 0.28 | 0.28 | 0.24 | 0.24 | 0.26 | 0.29 | 0.33 | 0.21 | 0.21 |
| 27 | 0.27 | 0.28 | 0.31 | 0.30 | 0.28 | 0.30 | 0.34 | 0.27 | 0.27 | 0.26 | 0.31 | 0.27 | 0.22 | 0.21 | 0.28 | 0.30 | 0.33 | 0.23 | 0.22 |
| 28 | 0.27 | 0.27 | 0.29 | 0.29 | 0.26 | 0.31 | 0.35 | 0.30 | 0.28 | 0.28 | 0.27 | 0.23 | 0.23 | 0.24 | 0.27 | 0.32 | 0.36 | 0.22 | 0.25 |
| 29 | 0.27 | 0.29 | 0.32 | 0.30 | 0.27 | 0.29 | 0.34 | 0.28 | 0.28 | 0.29 | 0.31 | 0.26 | 0.21 | 0.22 | 0.28 | 0.32 | 0.35 | 0.22 | 0.22 |
| 30 | 0.26 | 0.31 | 0.32 | 0.32 | 0.30 | 0.31 | 0.37 | 0.30 | 0.32 | 0.31 | 0.29 | 0.28 | 0.24 | 0.26 | 0.30 | 0.34 | 0.38 | 0.25 | 0.24 |
| 31 | 0.28 | 0.29 | 0.32 | 0.31 | 0.29 | 0.29 | 0.35 | 0.29 | 0.30 | 0.31 | 0.30 | 0.29 | 0.22 | 0.24 | 0.27 | 0.32 | 0.35 | 0.20 | 0.21 |
| 32 | 0.32 | 0.32 | 0.35 | 0.34 | 0.31 | 0.36 | 0.40 | 0.33 | 0.35 | 0.32 | 0.34 | 0.31 | 0.27 | 0.28 | 0.33 | 0.35 | 0.39 | 0.29 | 0.27 |
| 33 | 0.28 | 0.32 | 0.34 | 0.31 | 0.31 | 0.31 | 0.38 | 0.31 | 0.31 | 0.33 | 0.32 | 0.31 | 0.26 | 0.26 | 0.31 | 0.35 | 0.39 | 0.23 | 0.23 |
| 34 | 0.32 | 0.35 | 0.36 | 0.33 | 0.31 | 0.34 | 0.40 | 0.35 | 0.33 | 0.38 | 0.36 | 0.33 | 0.29 | 0.31 | 0.33 | 0.38 | 0.42 | 0.27 | 0.27 |
| 35 | 0.31 | 0.35 | 0.36 | 0.34 | 0.33 | 0.33 | 0.38 | 0.33 | 0.33 | 0.36 | 0.35 | 0.32 | 0.29 | 0.28 | 0.33 | 0.37 | 0.39 | 0.25 | 0.24 |
| 36 | 0.31 | 0.35 | 0.35 | 0.33 | 0.33 | 0.32 | 0.39 | 0.33 | 0.32 | 0.35 | 0.35 | 0.32 | 0.28 | 0.29 | 0.33 | 0.36 | 0.40 | 0.27 | 0.25 |
| 37 | 0.30 | 0.34 | 0.34 | 0.32 | 0.32 | 0.33 | 0.41 | 0.34 | 0.31 | 0.35 | 0.35 | 0.31 | 0.29 | 0.28 | 0.34 | 0.38 | 0.42 | 0.27 | 0.26 |
| 38 | 0.31 | 0.34 | 0.36 | 0.34 | 0.33 | 0.34 | 0.40 | 0.34 | 0.33 | 0.36 | 0.33 | 0.32 | 0.30 | 0.29 | 0.33 | 0.38 | 0.40 | 0.26 | 0.26 |

  

|   | 20  | 21  | 22  | 23  | 24  | 25  | 26  | 27  | 28  | 29  | 30  | 31  | 32  | 33  | 34  | 35  | 36  | 37  | 38  |
|---|-----|-----|-----|-----|-----|-----|-----|-----|-----|-----|-----|-----|-----|-----|-----|-----|-----|-----|-----|
| 1 | 186 | 186 | 180 | 233 | 210 | 214 | 191 | 198 | 203 | 203 | 190 | 216 | 212 | 271 | 270 | 270 | 275 | 275 | 273 |
| 2 | 187 | 188 | 182 | 235 | 213 | 217 | 194 | 202 | 206 | 207 | 194 | 220 | 216 | 275 | 274 | 274 | 278 | 278 | 277 |
| 3 | 187 | 187 | 181 | 234 | 211 | 214 | 191 | 199 | 203 | 203 | 190 | 217 | 212 | 272 | 270 | 270 | 275 | 275 | 273 |
| 4 | 185 | 185 | 179 | 232 | 209 | 213 | 190 | 197 | 202 | 202 | 189 | 216 | 212 | 271 | 269 | 269 | 274 | 274 | 272 |
| 5 | 120 | 120 | 114 | 167 | 146 | 151 | 133 | 141 | 145 | 146 | 137 | 165 | 165 | 216 | 214 | 214 | 220 | 220 | 219 |

|    | 20   | 21   | 22   | 23   | 24   | 25   | 26   | 27   | 28   | 29   | 30   | 31   | 32   | 33   | 34   | 35   | 36   | 37   | 38   |
|----|------|------|------|------|------|------|------|------|------|------|------|------|------|------|------|------|------|------|------|
| 6  | 136  | 139  | 137  | 187  | 172  | 178  | 164  | 172  | 176  | 177  | 170  | 197  | 198  | 247  | 245  | 245  | 251  | 251  | 251  |
| 7  | 138  | 141  | 141  | 189  | 177  | 184  | 172  | 181  | 184  | 185  | 179  | 206  | 208  | 255  | 253  | 253  | 260  | 259  | 260  |
| 8  | 123  | 128  | 130  | 175  | 168  | 177  | 170  | 178  | 181  | 182  | 179  | 205  | 209  | 251  | 249  | 249  | 256  | 256  | 257  |
| 9  | 128  | 133  | 134  | 180  | 172  | 180  | 172  | 180  | 184  | 184  | 180  | 207  | 210  | 254  | 252  | 252  | 259  | 259  | 259  |
| 10 | 89.2 | 91.9 | 91.2 | 140  | 128  | 136  | 128  | 136  | 140  | 140  | 138  | 165  | 169  | 210  | 208  | 208  | 215  | 215  | 216  |
| 11 | 91.2 | 95.0 | 96.1 | 143  | 133  | 142  | 136  | 144  | 148  | 148  | 147  | 173  | 178  | 217  | 216  | 216  | 222  | 222  | 223  |
| 12 | 90.7 | 93.0 | 91.6 | 141  | 128  | 136  | 127  | 135  | 139  | 139  | 137  | 163  | 167  | 209  | 207  | 207  | 214  | 214  | 214  |
| 13 | 64.6 | 65.3 | 62.9 | 113  | 99.3 | 108  | 103  | 111  | 114  | 115  | 115  | 141  | 147  | 183  | 181  | 181  | 188  | 188  | 189  |
| 14 | 66.4 | 67.2 | 64.8 | 115  | 101  | 109  | 104  | 112  | 116  | 116  | 116  | 142  | 148  | 185  | 183  | 183  | 190  | 190  | 191  |
| 15 | 49.1 | 60.3 | 74.8 | 97.8 | 111  | 124  | 138  | 145  | 146  | 147  | 156  | 177  | 189  | 206  | 204  | 204  | 212  | 212  | 215  |
| 16 | 39.2 | 51.0 | 67.1 | 86.3 | 102  | 115  | 132  | 138  | 139  | 140  | 151  | 171  | 183  | 197  | 195  | 195  | 203  | 203  | 207  |
| 17 | 18.4 | 30.5 | 49.6 | 59.4 | 78.7 | 93.3 | 116  | 121  | 121  | 122  | 136  | 153  | 167  | 174  | 172  | 172  | 181  | 181  | 185  |
| 18 | 2.8  | 13.9 | 31.9 | 55.4 | 64.3 | 78.4 | 97.9 | 103  | 104  | 105  | 118  | 136  | 149  | 160  | 158  | 158  | 166  | 166  | 170  |
| 19 | 6.6  | 9.3  | 25.9 | 55.0 | 59.7 | 73.4 | 91.9 | 97.3 | 98.3 | 98.8 | 112  | 130  | 143  | 155  | 153  | 153  | 161  | 161  | 165  |
| 20 |      | 12.4 | 31.2 | 52.6 | 62.5 | 76.6 | 97.2 | 102  | 103  | 104  | 117  | 135  | 148  | 158  | 156  | 156  | 164  | 164  | 168  |
| 21 | 0.29 |      | 19.5 | 47.7 | 50.6 | 64.5 | 85.1 | 90.1 | 90.8 | 91.3 | 105  | 122  | 136  | 146  | 144  | 144  | 152  | 152  | 156  |
| 22 | 0.20 | 0.31 |      | 54.0 | 38.7 | 50.5 | 66.0 | 71.4 | 72.5 | 73.0 | 85.8 | 104  | 117  | 132  | 130  | 130  | 138  | 138  | 141  |
| 23 | 0.23 | 0.33 | 0.23 |      | 45.5 | 58.3 | 95.3 | 96.5 | 94.9 | 95.3 | 116  | 124  | 141  | 127  | 126  | 125  | 134  | 134  | 139  |
| 24 | 0.23 | 0.31 | 0.21 | 0.23 |      | 14.9 | 50.0 | 51.1 | 49.8 | 50.1 | 70.9 | 79.6 | 96.7 | 95.5 | 93.7 | 93.6 | 102  | 102  | 106  |
| 25 | 0.22 | 0.32 | 0.20 | 0.21 | 0.16 |      | 39.8 | 39.2 | 37.0 | 37.3 | 59.7 | 65.5 | 83.1 | 81.6 | 79.8 | 79.7 | 88.0 | 87.9 | 91.4 |
| 26 | 0.23 | 0.33 | 0.21 | 0.24 | 0.18 | 0.16 |      | 8.1  | 12.2 | 12.6 | 21.2 | 39.1 | 51.3 | 82.7 | 81.1 | 81.1 | 87.1 | 87.0 | 87.3 |
| 27 | 0.23 | 0.34 | 0.23 | 0.24 | 0.18 | 0.16 | 0.18 |      | 4.6  | 4.8  | 20.6 | 32.6 | 46.7 | 74.7 | 73.1 | 73.0 | 79.1 | 79.0 | 79.3 |
| 28 | 0.25 | 0.35 | 0.24 | 0.23 | 0.20 | 0.21 | 0.22 | 0.21 |      | 0.5  | 23.8 | 31.5 | 47.1 | 70.6 | 69.0 | 68.9 | 75.1 | 75.0 | 75.6 |
| 29 | 0.25 | 0.33 | 0.22 | 0.25 | 0.18 | 0.18 | 0.19 | 0.17 | 0.20 |      | 23.7 | 31.1 | 46.7 | 70.2 | 68.6 | 68.5 | 74.7 | 74.6 | 75.2 |
| 30 | 0.26 | 0.36 | 0.25 | 0.24 | 0.25 | 0.22 | 0.22 | 0.24 | 0.20 | 0.23 |      | 27.4 | 32.8 | 81.7 | 80.5 | 80.4 | 84.7 | 84.6 | 83.1 |
| 31 | 0.22 | 0.34 | 0.20 | 0.24 | 0.19 | 0.13 | 0.18 | 0.17 | 0.19 | 0.17 | 0.21 |      | 19.2 | 57.1 | 56.1 | 56.1 | 59.1 | 59.0 | 56.7 |
| 32 | 0.30 | 0.37 | 0.27 | 0.28 | 0.24 | 0.23 | 0.22 | 0.21 | 0.25 | 0.20 | 0.25 | 0.21 |      | 69.6 | 68.9 | 68.9 | 69.9 | 69.8 | 65.7 |
| 33 | 0.27 | 0.37 | 0.24 | 0.25 | 0.22 | 0.19 | 0.24 | 0.24 | 0.27 | 0.22 | 0.28 | 0.20 | 0.27 |      | 1.9  | 1.9  | 6.9  | 6.9  | 13.4 |
| 34 | 0.31 | 0.39 | 0.28 | 0.29 | 0.25 | 0.25 | 0.28 | 0.28 | 0.29 | 0.25 | 0.31 | 0.24 | 0.30 | 0.13 |      | 0.1  | 8.6  | 8.6  | 14.8 |
| 35 | 0.29 | 0.39 | 0.26 | 0.27 | 0.25 | 0.22 | 0.27 | 0.25 | 0.29 | 0.26 | 0.30 | 0.23 | 0.31 | 0.13 | 0.18 |      | 8.7  | 8.7  | 14.9 |
| 36 | 0.30 | 0.39 | 0.26 | 0.27 | 0.21 | 0.22 | 0.26 | 0.24 | 0.28 | 0.23 | 0.30 | 0.23 | 0.28 | 0.15 | 0.15 | 0.19 |      | 0.2  | 7.5  |
| 37 | 0.31 | 0.39 | 0.26 | 0.29 | 0.24 | 0.25 | 0.28 | 0.27 | 0.29 | 0.26 | 0.32 | 0.27 | 0.31 | 0.16 | 0.18 | 0.18 | 0.17 |      | 7.4  |
| 38 | 0.30 | 0.39 | 0.25 | 0.28 | 0.26 | 0.25 | 0.27 | 0.27 | 0.30 | 0.26 | 0.31 | 0.24 | 0.30 | 0.16 | 0.19 | 0.15 | 0.20 | 0.17 |      |

**Table S5.** Pairwise  $F_{ST}$  of the *ad hoc* model-predicted isolated patch with the 38 genetic samples included in the landscape genetics analysis. Pairwise  $F_{ST}$  [adjusted for finite populations using the equation  $F_{ST}/(1-F_{ST})$ , Rousset et al. 2997], and p-value of exact tests between tsetse flies from the isolated patch identified with our pipeline and the 38 sampling sites from the main connected habitat. Estimates were calculated in ARLEQUIN v.3.5 (Excoffier and Lischer, 2010) with Wright’s statistics (Wright, 1951), following the variance method developed by Weir and Cockerham (1984) and using 10,000 permutations to obtain exact p-values between all samples.

| <b>Sample pair</b>   | <b>Geographic distance (km)</b> | <b><math>F_{ST}</math></b> | <b><math>F_{ST}/(1-F_{ST})</math></b> | <b>p-value</b> |
|----------------------|---------------------------------|----------------------------|---------------------------------------|----------------|
| Isolated patch vs 1  | 300.71                          | 0.113                      | 0.127                                 | <0.000         |
| Isolated patch vs 2  | 304.65                          | 0.107                      | 0.120                                 | <0.000         |
| Isolated patch vs 3  | 300.79                          | 0.117                      | 0.133                                 | <0.000         |
| Isolated patch vs 4  | 300.04                          | 0.102                      | 0.114                                 | <0.000         |
| Isolated patch vs 5  | 247.09                          | 0.108                      | 0.121                                 | <0.000         |
| Isolated patch vs 6  | 278.77                          | 0.135                      | 0.156                                 | <0.000         |
| Isolated patch vs 7  | 287.25                          | 0.166                      | 0.199                                 | <0.000         |
| Isolated patch vs 8  | 283.95                          | 0.147                      | 0.172                                 | <0.000         |
| Isolated patch vs 9  | 286.64                          | 0.111                      | 0.125                                 | <0.000         |
| Isolated patch vs 10 | 242.69                          | 0.131                      | 0.151                                 | <0.000         |
| Isolated patch vs 11 | 250.40                          | 0.097                      | 0.107                                 | <0.000         |
| Isolated patch vs 12 | 241.66                          | 0.104                      | 0.116                                 | <0.000         |
| Isolated patch vs 13 | 216.25                          | 0.117                      | 0.133                                 | <0.000         |
| Isolated patch vs 14 | 217.80                          | 0.126                      | 0.144                                 | <0.000         |
| Isolated patch vs 15 | 239.33                          | 0.105                      | 0.117                                 | <0.000         |
| Isolated patch vs 16 | 230.21                          | 0.095                      | 0.105                                 | <0.000         |
| Isolated patch vs 17 | 206.79                          | 0.154                      | 0.182                                 | <0.000         |
| Isolated patch vs 18 | 193.04                          | 0.097                      | 0.107                                 | <0.000         |
| Isolated patch vs 19 | 188.32                          | 0.125                      | 0.143                                 | <0.000         |
| Isolated patch vs 20 | 191.13                          | 0.106                      | 0.119                                 | <0.000         |
| Isolated patch vs 21 | 179.27                          | 0.131                      | 0.151                                 | <0.000         |
| Isolated patch vs 22 | 165.28                          | 0.123                      | 0.140                                 | <0.000         |
| Isolated patch vs 23 | 157.72                          | 0.086                      | 0.094                                 | <0.000         |
| Isolated patch vs 24 | 128.70                          | 0.105                      | 0.117                                 | <0.000         |
| Isolated patch vs 25 | 115.05                          | 0.110                      | 0.124                                 | <0.000         |
| Isolated patch vs 26 | 114.84                          | 0.101                      | 0.112                                 | <0.000         |
| Isolated patch vs 27 | 106.78                          | 0.118                      | 0.134                                 | <0.000         |
| Isolated patch vs 28 | 102.95                          | 0.086                      | 0.094                                 | <0.000         |
| Isolated patch vs 29 | 102.51                          | 0.123                      | 0.140                                 | <0.000         |
| Isolated patch vs 30 | 110.96                          | 0.123                      | 0.140                                 | <0.000         |
| Isolated patch vs 31 | 84.31                           | 0.123                      | 0.140                                 | <0.000         |
| Isolated patch vs 32 | 91.78                           | 0.126                      | 0.144                                 | <0.000         |
| Isolated patch vs 33 | 33.64                           | 0.119                      | 0.135                                 | <0.000         |
| Isolated patch vs 34 | 35.47                           | 0.118                      | 0.134                                 | <0.000         |
| Isolated patch vs 35 | 35.55                           | 0.136                      | 0.157                                 | <0.000         |
| Isolated patch vs 36 | 28.01                           | 0.112                      | 0.126                                 | <0.000         |
| Isolated patch vs 37 | 28.10                           | 0.122                      | 0.139                                 | <0.000         |
| Isolated patch vs 38 | 27.89                           | 0.128                      | 0.147                                 | <0.000         |
