# Supplementary material for: A spatial genetics approach to inform vector control of tsetse flies (Glossina fuscipes fuscipes) in Northern Uganda
Source: PubMed Central journal article supplement (PMC6010828; doi:10.1002/ece3.4050), 2018-05-04

**Appendix S4.** Additional data providing visualization of net photosynthesis-based connectivity surface output (Fig. 2: O<sub>4</sub>) with different parameter cutoffs for the final clumping parameters used to identify discrete landscape patches (Fig. 2: M<sub>5</sub>). Maps 1-38 (page 1) show data used to choose the appropriate connectivity surface score cutoff (0.35-0.65) and minimum number of pixels considered (1-6). Maps 39-42 (page 2) show data used to choose the appropriate distance between connectivity surface patches (5-8 km) required to consider it “isolated”.

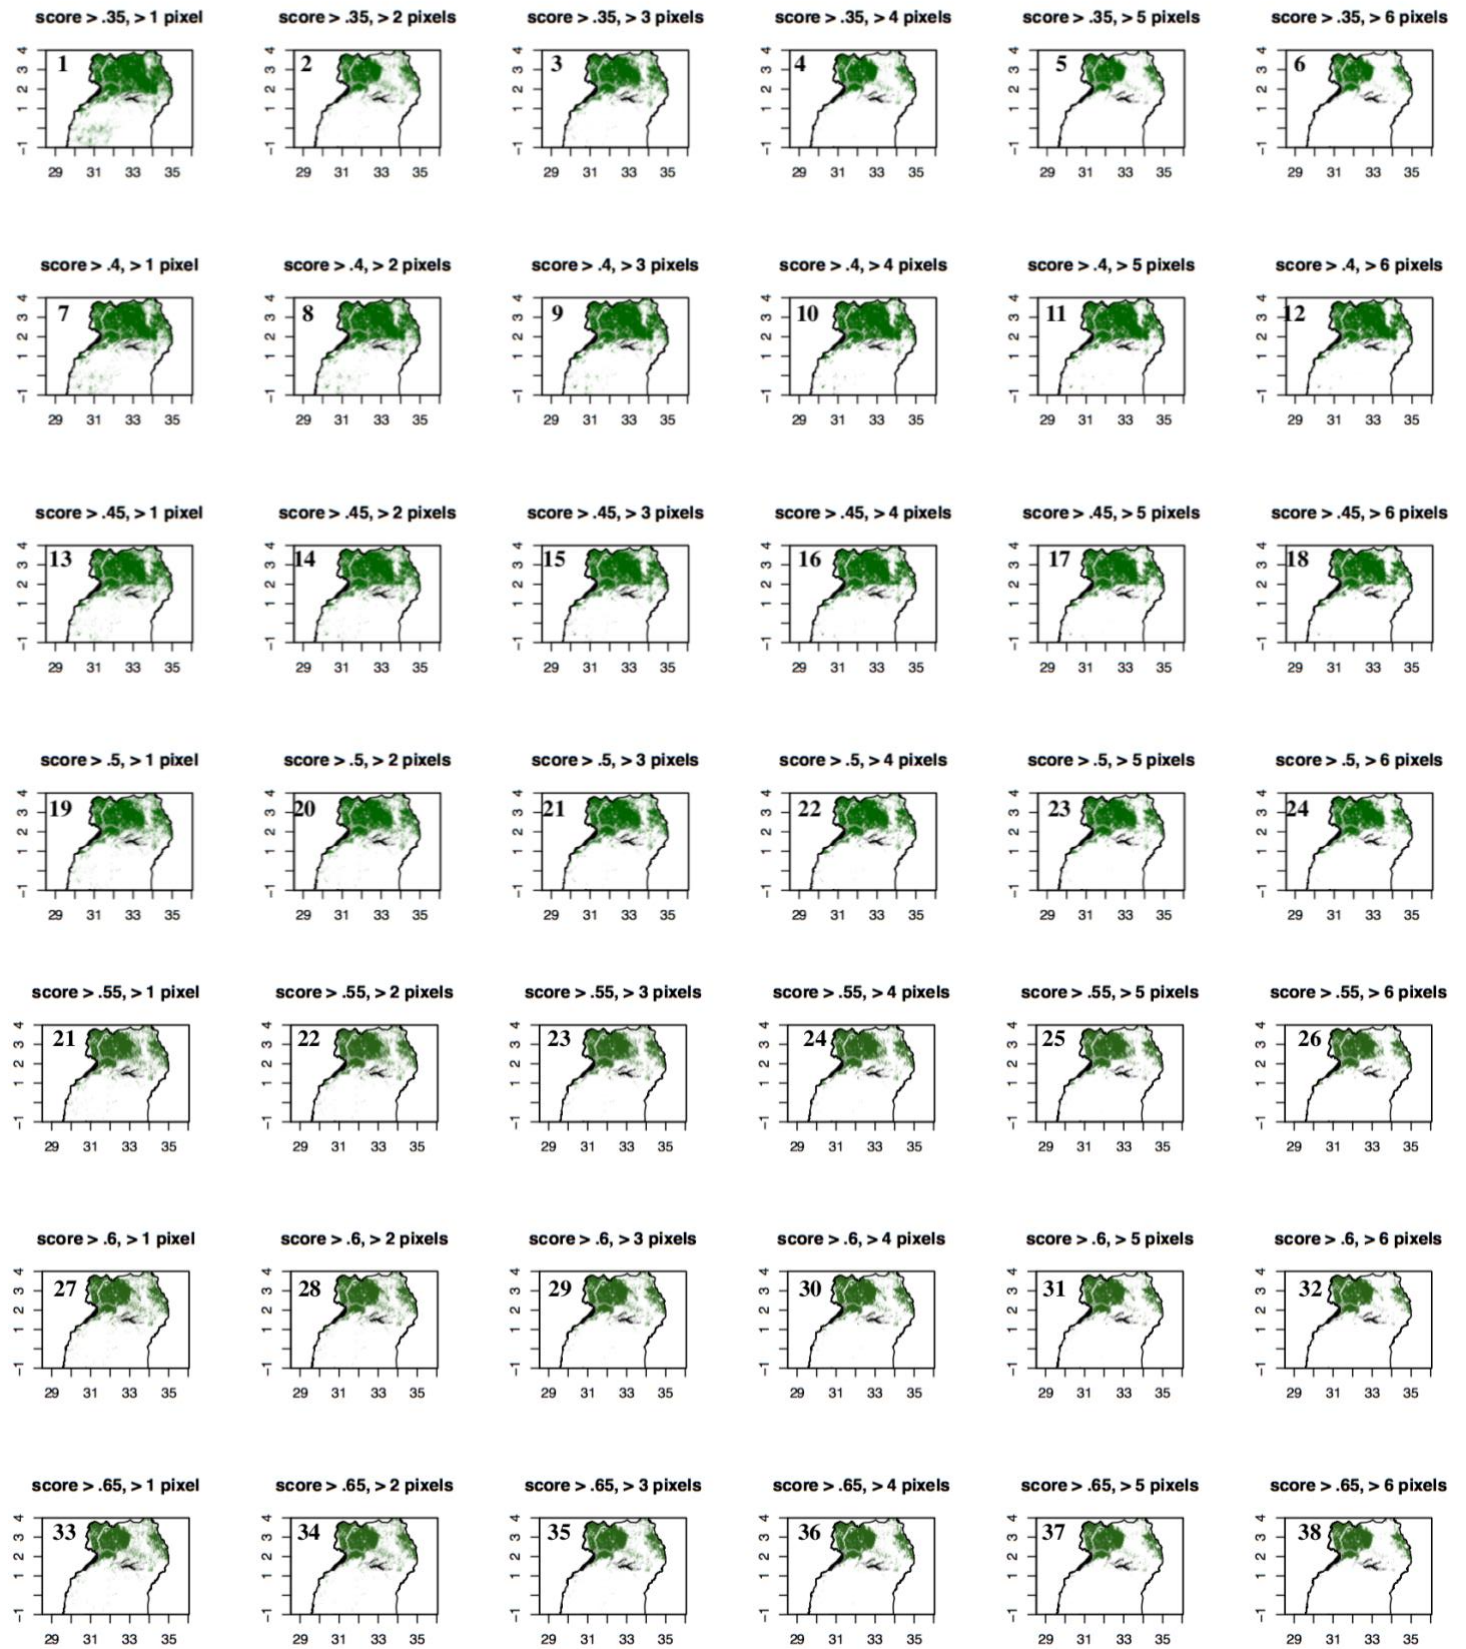

score > .5, > 3 pixels, > 5 km apart

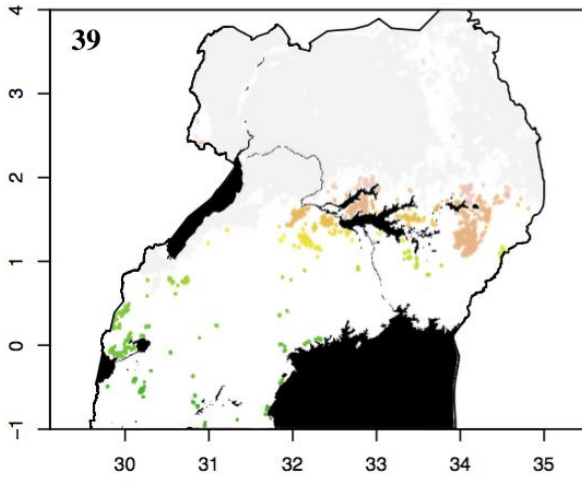

score > .5, > 3 pixels, > 6 km apart

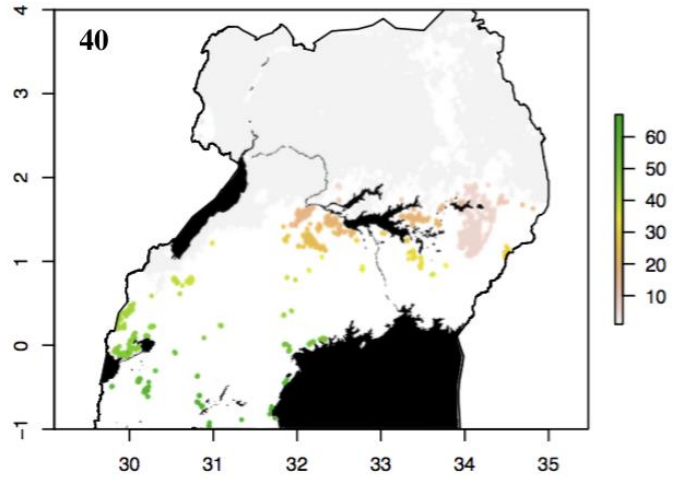

score > .5, > 3 pixels, > 7 km apart

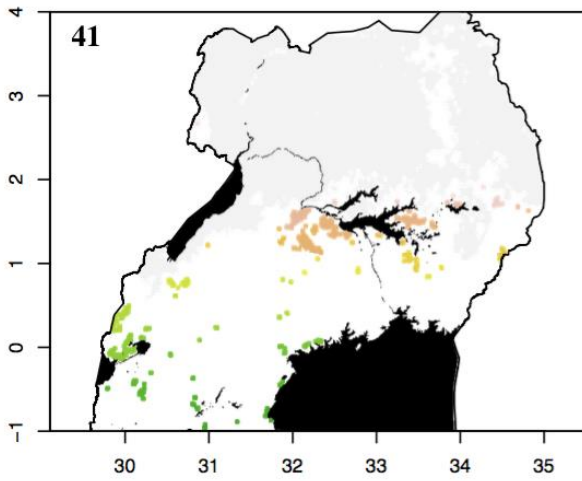

score > .5, > 3 pixels, > 8 km apart

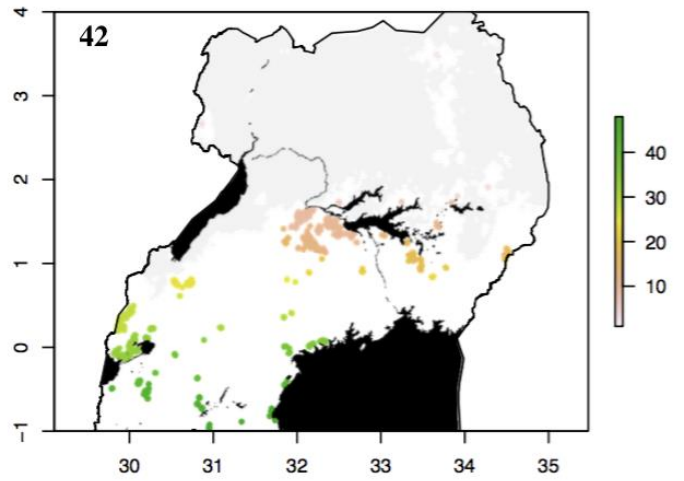

Supplement: ECE3-8-5336-s004.pdf [file ECE3-8-5336-s004.pdf]
